# Supplementary material for: Stereoselective alkylation of tartrate derivatives. A concise route to (+)-O-methylpiscidic acid and natural analogues
Source: Royal Society of Chemistry journal article supplement (doi:10.1039/b606362b), 2006-01-01
Supplement: b606362b.pdf [file b606362b.pdf]

**Representative procedure for the alkylation reaction: Preparation of 9.** LDA was prepared by adding BuLi (4.68 mL, 7.5 mmol, 1.6 M in hexanes) to a solution of diisopropylamine (1.23 mL, 8.8 mmol) in 9 mL of THF, at  $-78\text{ }^{\circ}\text{C}$ . The solution was stirred 15 min at  $0\text{ }^{\circ}\text{C}$  and then cooled again to  $-78\text{ }^{\circ}\text{C}$ . A solution of **8** (1.2 g, 3.4 mmol) in THF (6 mL) was added to the LDA solution and the mixture was stirred for 30 min at  $-78\text{ }^{\circ}\text{C}$ . MeI (1.05 mL, 17 mmol) in HMPA (3.5 mL) was then added to the dienolate solution. The reaction mixture was stirred for 2 hours, while the temperature was allowed to rise to  $0\text{ }^{\circ}\text{C}$  and quenched with saturated aqueous  $\text{NH}_4\text{Cl}$  solution. The aqueous phase was extracted with ethyl ether (3x20 mL), the combined organic phases were dried ( $\text{MgSO}_4$ ) and concentrated. Purification of the residue by medium pressure column chromatography (5/95 AcOEt/hexane) afforded **9** (1.28g, 99%) as a viscous colourless oil.  $[\alpha]_{\text{D}}^{20}$  -99.9 (2.02,  $\text{CHCl}_3$ ).  $^1\text{H}$  NMR ( $\text{CDCl}_3$ ), 300 MHz:  $\delta$  3.35 (3H, s), 3.23 (3H, s), 2.93-2.70 (4H, m), 1.66 (3H, s), 1.54 (3H, s), 1.48 (3H, s), 1.39 (3H, s), 1.28 (3H, t,  $J=7.4\text{ Hz}$ ), 1.21 (3H, t,  $J=7.4\text{ Hz}$ ).  $^{13}\text{C}$  NMR ( $\text{CDCl}_3$ ), 75 MHz:  $\delta$  203.6, 201.0, 100.7, 100.4, 84.3, 82.0, 48.6, 47.8, 25.6, 25.3, 22.8, 22.5, 19.5, 19.2, 14.8, 14.1.  $m/z$  349.0  $[\text{M-Et}]^+$ .

**Compound 10:**  $[\alpha]_{\text{D}}^{20}$  -29.9 (0.29,  $\text{CHCl}_3$ ).  $^1\text{H}$  NMR ( $\text{CDCl}_3$ ), 300 MHz:  $\delta$  4.91 (1H, s), 3.30 (3H, s), 3.27 (3H, s), 3.09 (2H, dd,  $J=17.3\text{ Hz}$ ,  $J=2.4\text{ Hz}$ ), 2.96-2.76 (4H, m), 1.81 (3H, t,  $J=2.4\text{ Hz}$ ), 1.39 (3H, s), 1.35 (3H, s), 1.28 (3H, t,  $J=7.4\text{ Hz}$ ), 1.24 (3H, t,  $J=7.4\text{ Hz}$ ).  $^{13}\text{C}$  NMR ( $\text{CDCl}_3$ ), 75 MHz:  $\delta$  199.0, 198.4, 100.7, 99.9, 81.4, 78.8, 74.0, 73.1, 51.6, 48.5, 29.3, 22.9, 22.1, 17.7, 17.5, 14.4, 14.1, 3.6.

**Compound 11:**  $[\alpha]_{\text{D}}^{20}$  -14.3 (0.44,  $\text{CHCl}_3$ ).  $^1\text{H}$  NMR ( $\text{CDCl}_3$ ), 300 MHz:  $\delta$  7.32 (2H, d,  $J=8.6\text{ Hz}$ ), 6.79 (2H, d,  $J=8.7\text{ Hz}$ ), 3.99 (1H, s), 3.79 (3H, s), 3.32 (3H, s), 3.32 (1H, d,  $J=14.1\text{ Hz}$ ), 3.18 (1H, d,  $J=14.3\text{ Hz}$ ), 2.97-2.82 (4H, m), 2.88 (3H, s), 1.34 (3H, s), 1.31 (3H, s), 1.28 (3H, t,  $J=7.4\text{ Hz}$ ), 1.27 (3H, t,  $J=7.4\text{ Hz}$ ).  $^{13}\text{C}$  NMR ( $\text{CDCl}_3$ ), 75 MHz:  $\delta$  199.3, 198.8, 158.5, 131.9, 128.0, 113.7, 113.0, 100.3, 99.6, 83.0, 73.2, 55.2, 51.6, 48.0, 42.4, 22.9, 22.1, 17.5, 14.4, 14.1.  $m/z$  440.9  $[\text{M-2xMe}]^+$ .

**Compound 12:**  $[\alpha]_{\text{D}}^{20}$  -41.2 (2.37,  $\text{CHCl}_3$ ).  $^1\text{H}$  NMR ( $\text{CDCl}_3$ ), 300 MHz:  $\delta$  4.92 (2H, d,  $J=12.1\text{ Hz}$ ), 4.48 (1H, s), 3.28 (3H, s), 3.28 (3H, s), 3.25 (3H, s), 2.95 (1H, d,  $J=14.1\text{ Hz}$ ), 2.91-2.80 (4H, m), 2.55 (1H, d,  $J=14.0\text{ Hz}$ ), 1.89 (3H, s), 1.38 (3H, s), 1.30 (3H, s), 1.27 (3H, t,  $J=7.4\text{ Hz}$ ), 1.25 (3H, t,  $J=7.2\text{ Hz}$ ).  $^{13}\text{C}$  NMR ( $\text{CDCl}_3$ ), 75 MHz:  $\delta$  200.0, 198.5, 141.6, 115.9, 100.5, 99.4, 82.6, 73.4, 51.6, 48.4, 45.2, 23.9, 22.8, 22.1, 17.7, 17.6, 14.4, 14.1.

**Compound 13:**  $[\alpha]_{\text{D}}^{20}$  -216.0 (0.20,  $\text{CHCl}_3$ ).  $^1\text{H}$  NMR ( $\text{CDCl}_3$ ), 300 MHz:  $\delta$  3.56 (2H, dd,  $J=16.2\text{ Hz}$ ,  $J=2.6\text{ Hz}$ ), 3.51 (3H, s), 3.35 (2H, dd,  $J=17.1\text{ Hz}$ ,  $J=2.6\text{ Hz}$ ), 3.28 (3H, s), 3.11-2.70 (4H, m),

2.11 (1H, t, J=2.6 Hz), 2.00 (1H, t, J=2.6 Hz), 1.56 (3H, s), 1.47 (3H, s), 1.31 (3H, t, J=7.4 Hz), 1.21 (3H, t, J=7.4 Hz). <sup>13</sup>C NMR (CDCl<sub>3</sub>), 75 MHz: δ 203.0, 201.0, 101.6, 100.8, 81.6, 79.0, 72.6, 70.9, 48.7, 29.4, 27.5, 23.3, 22.9, 19.5, 19.1, 14.7, 13.9.

**Compound 14:** [ $\alpha$ ]<sub>D</sub><sup>20</sup>-51.5 (0.40, CHCl<sub>3</sub>). <sup>1</sup>H NMR (CDCl<sub>3</sub>), 300 MHz: δ 4.90 (1H, s), 3.30 (3H, s), 3.27 (3H, s), 3.17 (2H, dd, J=17.0 Hz, J=2.6 Hz), 2.92-2.83 (4H, m), 2.10 (1H, t, J=2.6 Hz), 1.40 (3H, s), 1.35 (3H, s), 1.28 (3H, t, J=7.4 Hz), 1.24 (3H, t, J=7.4 Hz). <sup>13</sup>C NMR (CDCl<sub>3</sub>), 75 MHz: δ 199.0, 198.1, 100.9, 100.0, 80.8, 78.5, 73.9, 71.3, 51.7, 48.5, 29.0, 23.1, 22.1, 17.1, 17.4, 14.4, 14.1.

**Compound 15:** [ $\alpha$ ]<sub>D</sub><sup>20</sup>-10.8 (1.06, CHCl<sub>3</sub>). <sup>1</sup>H NMR (CDCl<sub>3</sub>), 300 MHz: δ 5.82-5.73 (2H, m), 5.03 (4H, d, J=12.8 Hz), 3.33 (6H, s), 3.18 (2H, dd, J=15.1 Hz, J=5.8 Hz), 2.77 (4H, q, J=7.3 Hz), 2.66 (2H, dd, J=14.7 Hz, J=7.08 Hz), 1.47 (6H, s), 1.22 (6H, t, J=7.3 Hz). <sup>13</sup>C NMR (CDCl<sub>3</sub>), 75 MHz: δ 201.6, 132.6, 118.4, 100.2, 83.2, 51.3, 39.6, 23.0, 18.9, 14.0.

**Compound 16:** [ $\alpha$ ]<sub>D</sub><sup>20</sup>-72.9 (1.57, CHCl<sub>3</sub>). <sup>1</sup>H NMR (CDCl<sub>3</sub>), 300 MHz: δ 7.42-7.37 (2H, m), 7.26-7.22 (3H, m), 3.98 (1H, s), 3.39 (1H, d, J=14.1 Hz), 3.33 (3H, s), 3.25 (2H, d, J=14.1 Hz), 2.84 (3H, s), 2.97-2.80 (4H, m), 1.34 (3H, s), 1.30 (3H, s), 1.28-1.25 (6H, m). <sup>13</sup>C NMR (CDCl<sub>3</sub>), 75 MHz: δ 199.2, 198.8, 135.9, 131.0, 127.6, 126.7, 100.3, 99.6, 82.8, 73.2, 51.6, 47.9, 43.2, 22.9, 22.1, 17.5, 14.4, 14.1.

**Compound 17:** [ $\alpha$ ]<sub>D</sub><sup>20</sup>-75.7 (0.63, CH<sub>2</sub>Cl<sub>2</sub>). <sup>1</sup>H NMR (CDCl<sub>3</sub>), 300 MHz: δ 7.16 (s, 5H), 3.74 (1H, d, J=12.8 Hz), 3.69 (s, 3H), 3.50 (s, 3H), 3.11 (1H, d, J=12.8 Hz), 2.86 (4H, q, J=7.4 Hz), 2.78-2.67 (4H, m), 1.64 (s, 3H), 1.51 (s, 3H), 1.49 (s, 3H), 1.26 (3H, t, J=7.4 Hz), 1.13 (3H, t, J=7.4 Hz). <sup>13</sup>C NMR (CDCl<sub>3</sub>), 75 MHz: δ 202.5, 135.8, 131.1, 127.3, 126.2, 100.5, 100.4, 84.8, 82.8, 50.3, 50.2, 41.4, 24.9, 23.5, 23.3, 20.1, 19.6, 14.2, 14.0.

**Compound ent-11:** [ $\alpha$ ]<sub>D</sub><sup>20</sup>+15.0 (1.2, CHCl<sub>3</sub>). All other data was identical to **11**.

**Compound 18:** To a solution of **ent-11** (0.300 g, 0.63 mmol) in CH<sub>2</sub>Cl<sub>2</sub> (3 mL) was added TFA (0.350 mL, 4.44 mmol) and a catalytic quantity of H<sub>2</sub>O. After refluxing for 3 h, the reaction mixture was evaporated and purified by medium pressure column chromatography (2/8 AcOEt/hex). Diol **18** was obtained as a very viscous colourless oil (0.223 g, 98%). [ $\alpha$ ]<sub>D</sub><sup>20</sup>-44.2 (1.04, CHCl<sub>3</sub>). <sup>1</sup>H NMR (CDCl<sub>3</sub>), 300 MHz: δ 7.12 (2H, d, J=8.6 Hz), 6.80 (2H, d, J=8.7 Hz), 4.43 (1H, s), 3.77 (3H, s), 3.22 (1H, d, J=13.9 Hz), 3.12 (1H, d, J=13.9 Hz), 2.95-2.76 (4H, m), 1.26 (3H, t, J=7.4 Hz), 1.19 (3H, t, J=7.4 Hz). <sup>13</sup>C NMR (CDCl<sub>3</sub>), 75 MHz: δ 204.2, 201.4, 158.8, 131.7, 125.7, 113.7, 84.2, 79.6, 55.1, 40.5, 23.2, 14.2, 14.1.

**4'-O-methyl-piscidic acid dimethylester 2:** To a solution of **18** (0.200 g, 0.56 mmol) in MeOH (1.5 mL) was added MeONa (0.440 g, 1.67 mmol) and the reaction mixture was stirred for 15 min and quenched with saturated aqueous NH<sub>4</sub>Cl solution. The aqueous phase was extracted with ethyl acetate (3 x 10 mL), the combined organic phases were dried (MgSO<sub>4</sub>) and concentrated. Purification of the residue by recrystallisation (Hex/AcOEt) afforded **2** (0.158 g, 95%) as white crystals.  $[\alpha]_D^{20} +42.8$  (1.02, CHCl<sub>3</sub>), (isolated natural product,  $[\alpha]_D^{24} +44 \pm 2$ , c=0.60, CHCl<sub>3</sub><sup>7</sup>; synthesised product,  $[\alpha]_D^{25} +46 \pm 2$ , c=1.01, EtOH<sup>7</sup>). Mp= 105-106 °C (lit.<sup>7</sup> 107-108 °C). <sup>1</sup>H NMR (CDCl<sub>3</sub>), 300 MHz:  $\delta$  7.08 (2H, d, J=8.6 Hz), 6.80 (2H, d, J=8.7 Hz), 4.54 (1H, s), 3.78 (3H, s), 3.76 (3H, s), 3.74 (3H, s), 3.28 (1H, d, J=13.9 Hz), 3.03 (1H, d, J=13.9 Hz). <sup>13</sup>C NMR (CDCl<sub>3</sub>), 75 MHz:  $\delta$  173.3, 171.6, 158.7, 131.0, 126.9, 113.7, 113.6, 80.1, 75.1, 55.1, 52.8, 40.5.

**Compound ent-12:**  $[\alpha]_D^{20} +42.0$  (1.5, CHCl<sub>3</sub>). All other data was identical to **12**.

**Compound 20:** To a solution of **ent-12** (0.150 g, 0.37 mmol) in CH<sub>2</sub>Cl<sub>2</sub> (2 mL) was added TFA (0.199 mL, 2.59 mmol) and a catalytic quantity of H<sub>2</sub>O. After refluxing for 2 h, the reaction mixture was evaporated and purified by preparative TLC (4/6 AcOEt/hex). Diol **20** was obtained as a very viscous colourless oil (0.107 g, 99%).  $[\alpha]_D^{20} +3.12$  (0.96, CHCl<sub>3</sub>). <sup>1</sup>H NMR (CDCl<sub>3</sub>), 300 MHz:  $\delta$  4.97 (1H, t, J=1.7 Hz), 4.84 (1H, d, J=0.93 Hz), 4.36 (1H, s), 2.95-2.84 (4H, m), 2.74 (1H, d, J=13.6 Hz), 2.64 (1H, d, J=13.7 Hz), 1.75 (3H, s), 1.265 (3H, t, J=7.4 Hz), 1.264 (3H, t, J=7.4 Hz). <sup>13</sup>C NMR (CDCl<sub>3</sub>), 75 MHz:  $\delta$  204.5, 200.9, 140.0, 116.9, 83.1, 80.0, 43.3, 24.1, 23.4, 23.2, 14.2, 14.0.

**Compound 21:** To a solution of **20** (0.100 g, 0.34 mmol) in MeOH (1 mL) was added MeONa (5.5 mg, 1.02 mmol) and the reaction mixture was stirred for 15 min and quenched with saturated aqueous NH<sub>4</sub>Cl solution. The aqueous phase was extracted with ethyl acetate (3 x 10 mL), the combined organic phases were dried (MgSO<sub>4</sub>) and concentrated. Purification of the residue by preparative TLC (4/6 AcOEt/Hex) afforded **21** (0.71 g, 95%) as very viscous colourless oil.  $[\alpha]_D^{20} +45.1$  (0.49, CHCl<sub>3</sub>). <sup>1</sup>H NMR (CDCl<sub>3</sub>), 400 MHz:  $\delta$  4.89 (1H, t, J=1.5 Hz), 4.75 (1H, s), 4.44 (1H, s), 3.81 (3H, s), 3.77 (3H, s), 2.80 (1H, d, J=13.9 Hz), 2.64 (1H, d, J=13.8 Hz), 1.75 (3H, s). <sup>13</sup>C NMR (CDCl<sub>3</sub>), 100 MHz:  $\delta$  173.7, 171.6, 140.8, 115.5, 79.8, 75.5, 52.83, 52.8, 42.8, 23.8.

**Compound 22:** A solution of **21** (0.070 g, 0.30 mmol) in AcOEt (1 mL) was added to Pd/C 10% (8 mg, 2.5 mol%) in AcOEt (1 mL). The reaction mixture was hydrogenated at 50 atm for 24h. The mixture was filtrated, the solvents evaporated and the residue was purified by preparative TLC (1/1 AcOEt/Hex) to afford **22** as a very viscous oil (0.062 g, 88%).  $[\alpha]_D^{20} +29.5$  (0.22, CHCl<sub>3</sub>). <sup>1</sup>H NMR

(CDCl<sub>3</sub>), 400 MHz:  $\delta$  4.32 (1H, s), 3.82 (3H, s), 3.76 (3H, s), 2.04 (1H, dd, J=14.2 Hz, J=5.8 Hz), 1.77-1.66 (2H, m), 0.96 (3H, d, J=6.6 Hz), 0.84 (3H, d, J=6.6 Hz). <sup>13</sup>C NMR (CDCl<sub>3</sub>), 100 MHz:  $\delta$  174.7, 171.6, 79.3, 76.1, 52.9, 52.7, 43.0, 24.1, 24.0, 23.2.
